# Supplementary material
Source: Springer Nature journal article supplement (https://www.springermedizin.de/resource/supplementary/12913_2013_2948_MOESM2_ESM.pdf/9532236)
Supplement: MOESM2 [file 9532236]

Referred cases (36%)  
Self-Referrals (64%)

OPD II

SHORT  
STAY

HOME

OTHERS  
Referrals

WARDS  
Male / female

HOME

OTHERS  
(Internal) Referrals

HOME
